# Supplementary material
Source: PubMed Central journal article supplement (PMC4474777)
Supplement: NIHMS684948-supplement-Supp_FigureS1-S4___TableS1-S9.pdf [file NIHMS684948-supplement-Supp_FigureS1-S4___TableS1-S9.pdf]

# Supplemental Data

## Supplemental Figures and Legends

**Figure S1. Distributional characteristics of genotyped SNPs.** Distributions of successfully genotyped variants (A) by MAF for each race/ethnicity, and (B) by functional effect as determined by SnpEff for all variants genotyped in  $\geq 1$  race/ethnicity (includes monomorphic sites).

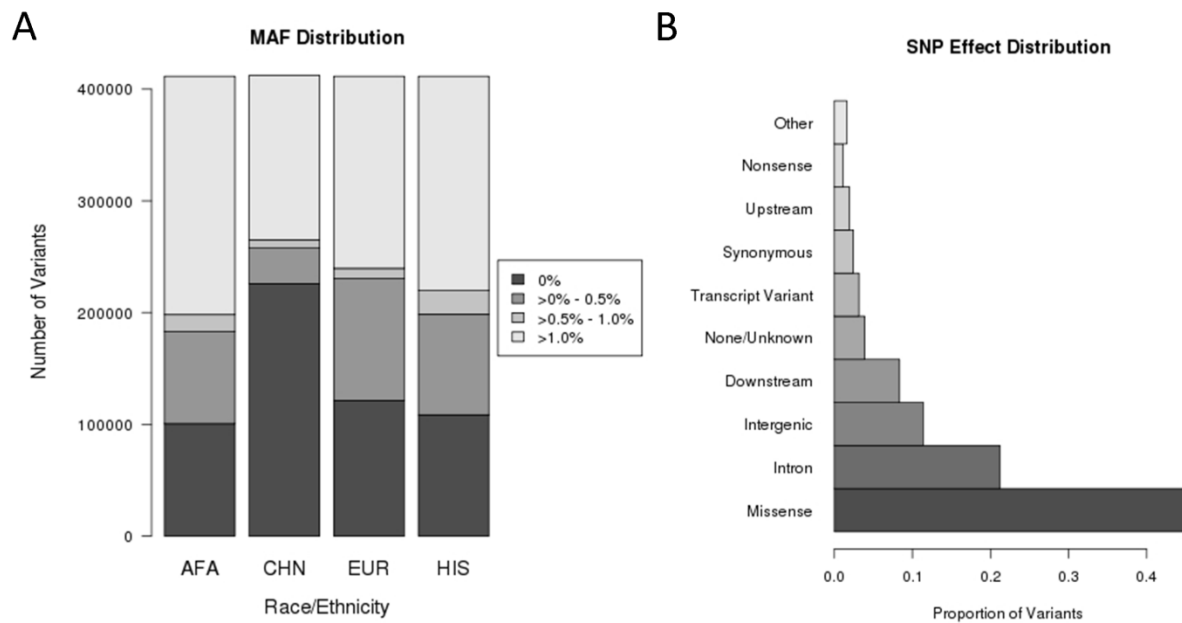

**Figure S2. Manhattan plots for the serum HGF single-variant ethnicity stratified association analyses.** Results from the single-variant association analyses ( $-\log_{10}(p)$ ) plotted by chromosomal positions (NCBI build 37) for associations with (A) African American, (B) Chinese American, (C) European American, and (D) Hispanic American subjects. Results were adjusted for age, sex, and the first three PCs. Significant results labeled by rsID.

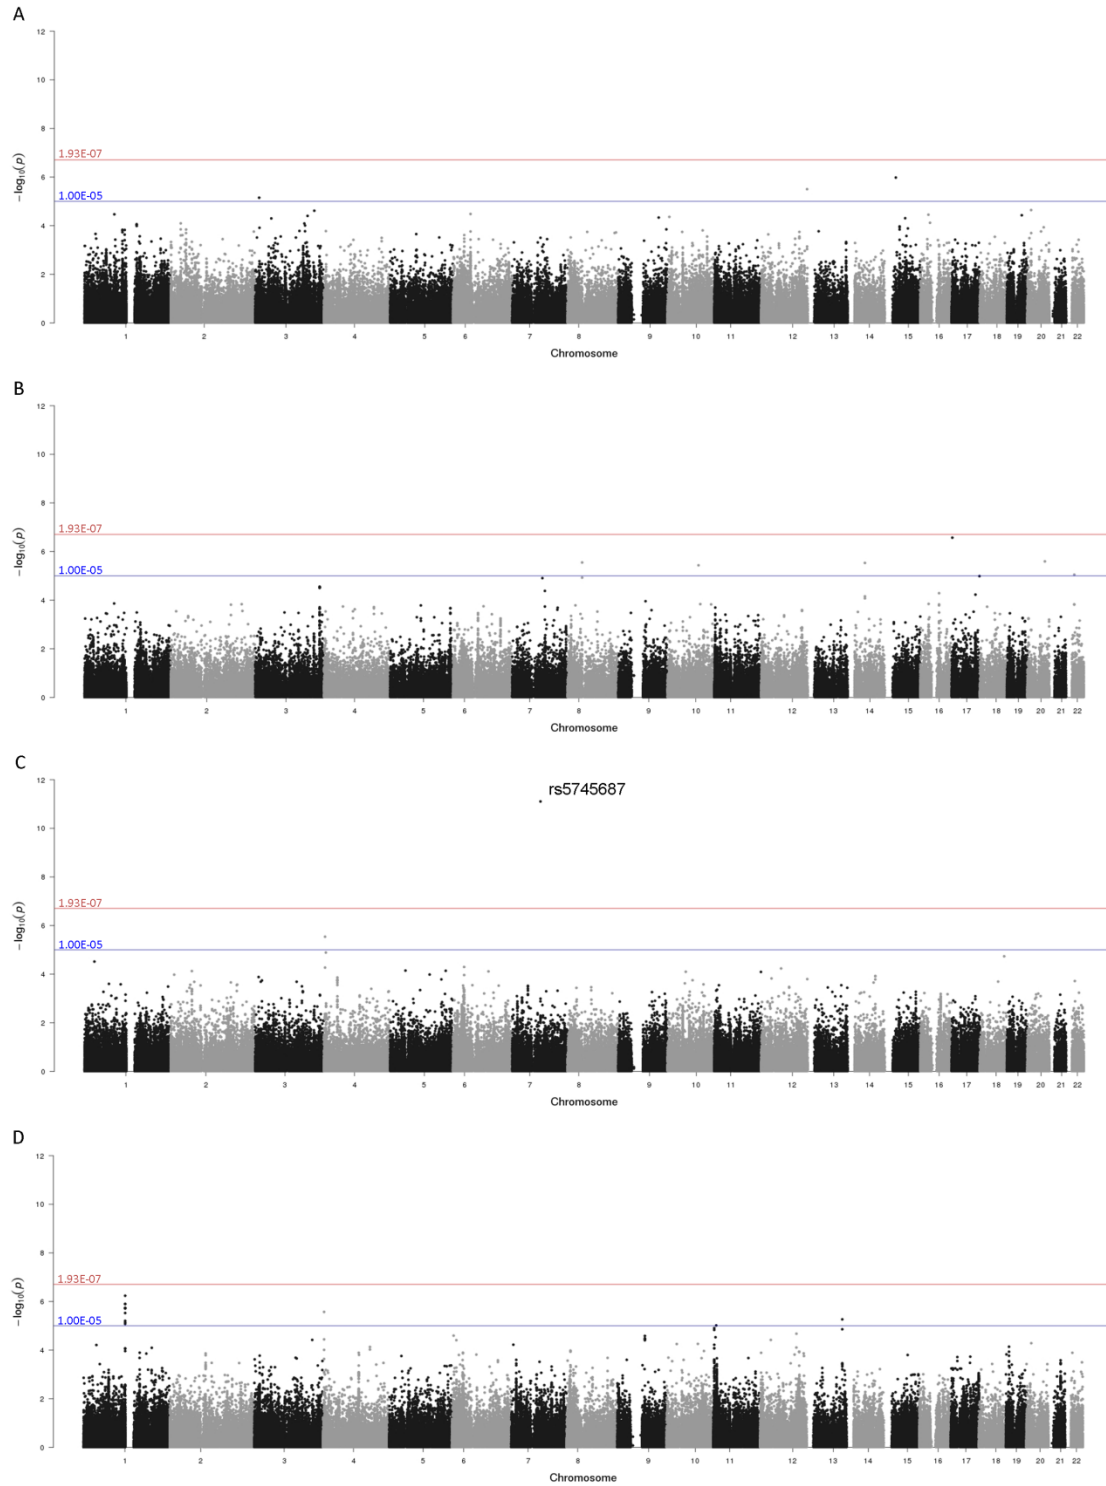

**Figure S3. QQ-plot of SNP-level association results.** Observed and expected  $-\log_{10}$  P-values from the race/ethnicity-stratified single-SNP testing and METASOFT meta-analysis, differentiated by plot symbol. The 90% confidence region is indicated by the greyed area, while the significance threshold ( $1.95E-07$ ) is demarcated by the dashed line. Significantly associated variants are labeled by rsID.

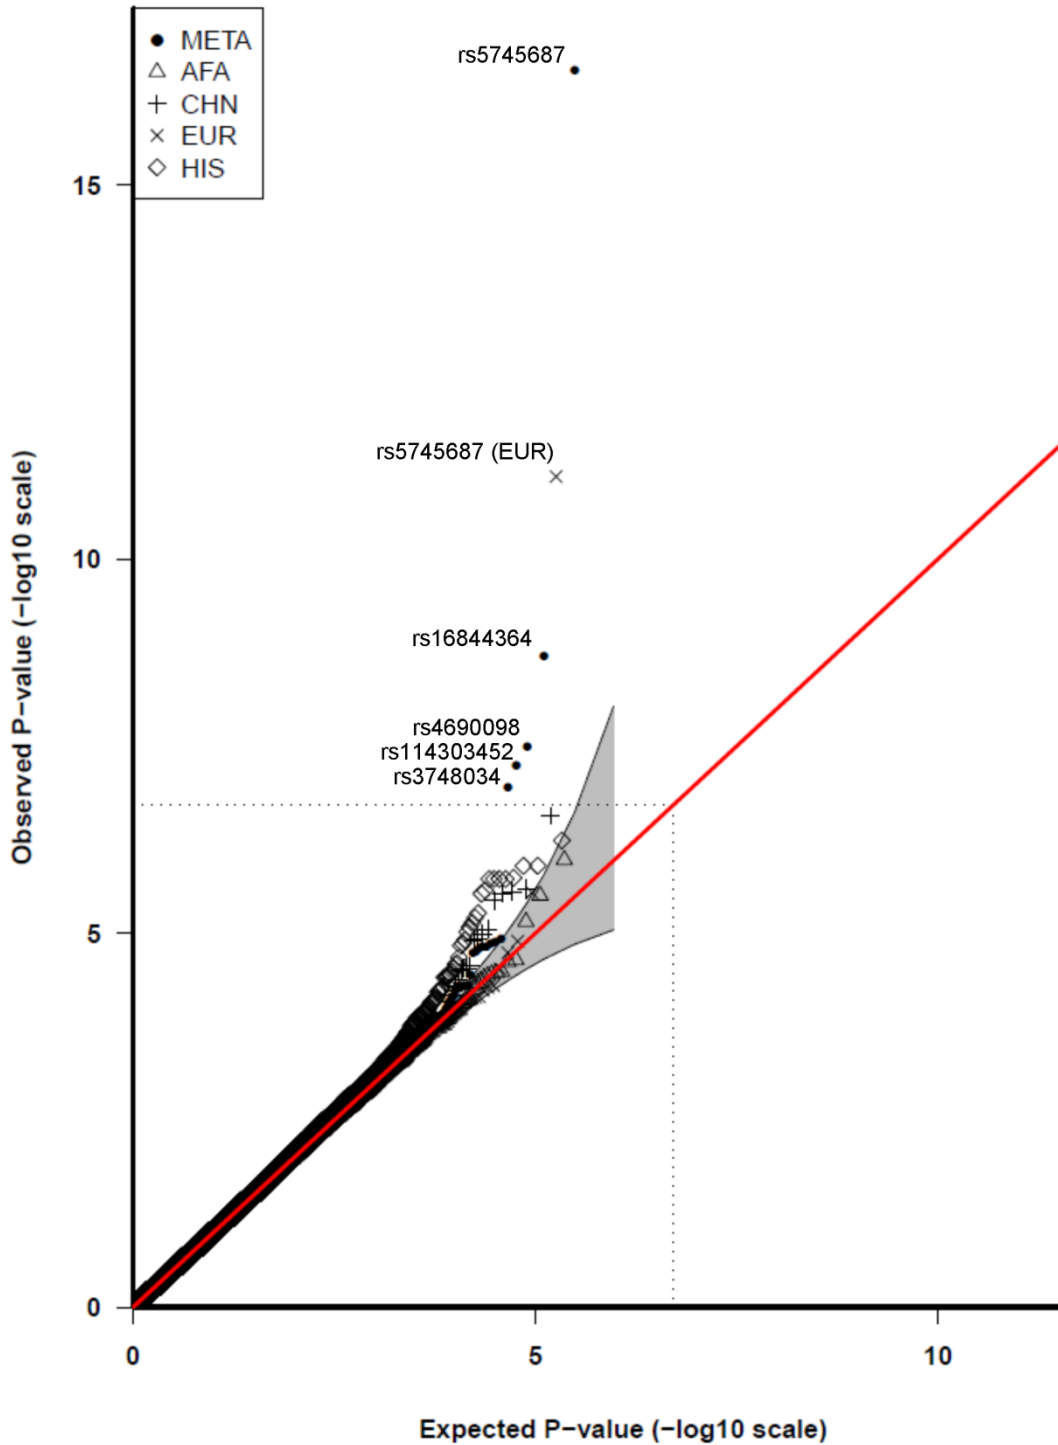

**Figure S4. QQ-plot of gene-level association results.** Observed and expected  $-\log_{10}$  P-values from the race/ethnicity-stratified SKAT-O and MetaSKAT gene-based testing, differentiated by plot symbol. The 90% confidence region is indicated by the greyed area, while the significance threshold ( $4.00E-06$ ) is demarcated by the dashed line. Significantly associated genes are labeled by gene symbol.

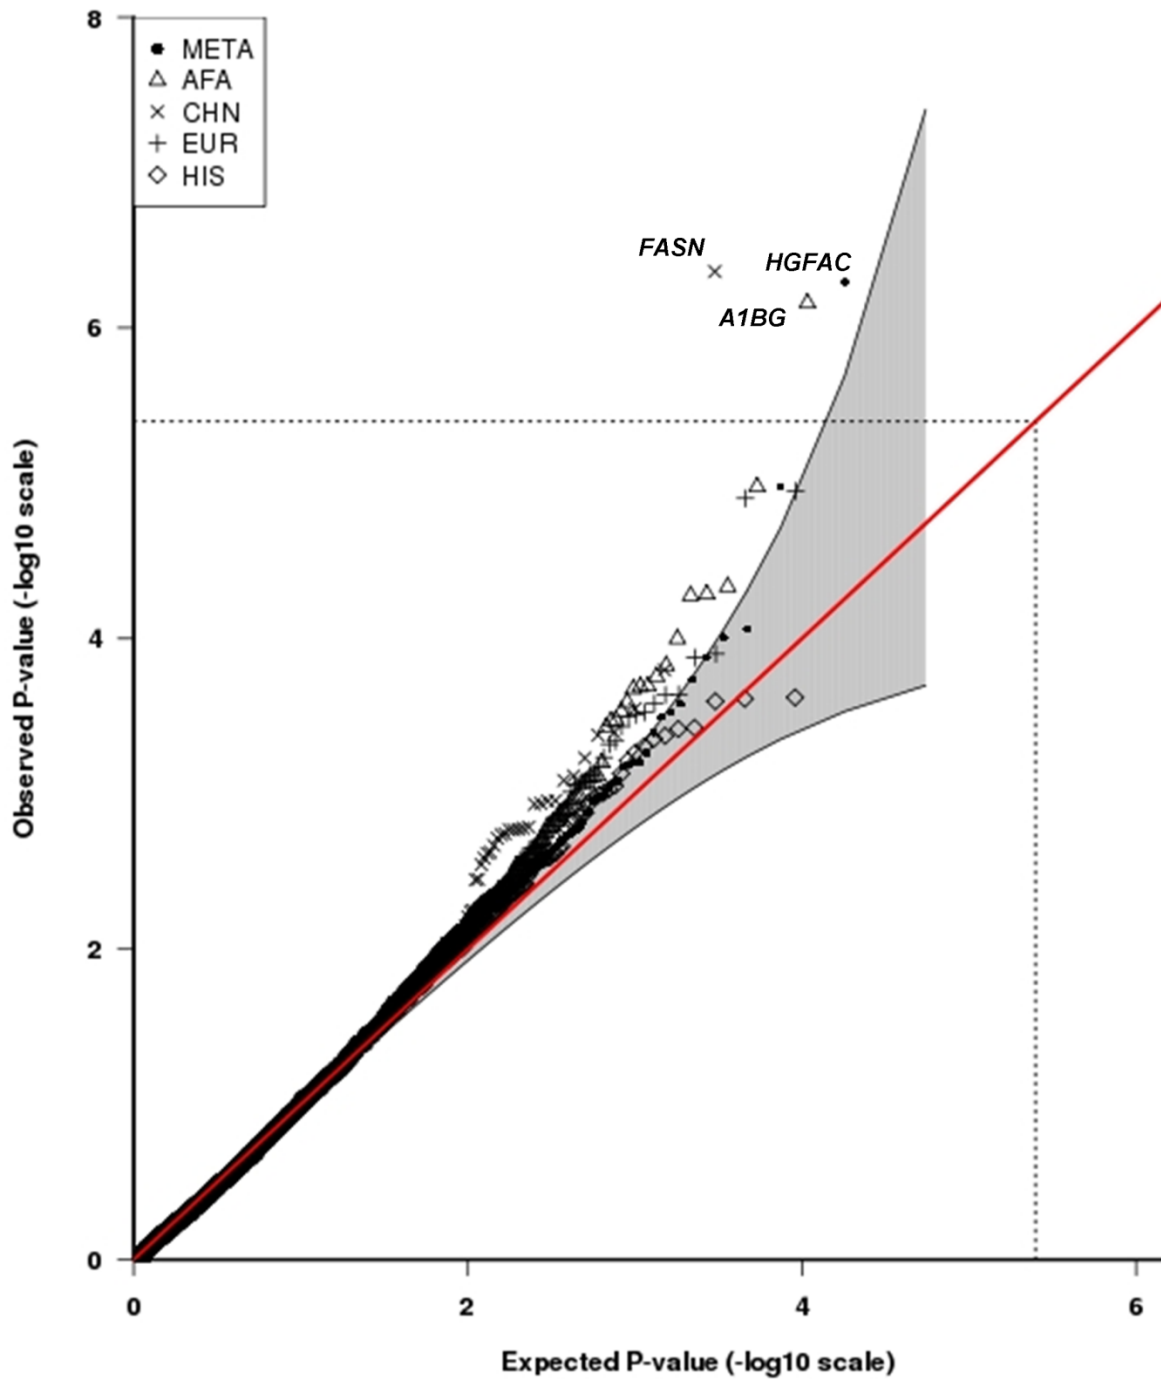

## Supplemental Tables

Table S1. Exam 1 characteristics by race/ethnicity for all participants with genotype data, presented as count (%) or Mean (SD).

| Characteristics                    | Race      |          |           |           | P*      |
|------------------------------------|-----------|----------|-----------|-----------|---------|
|                                    | AFA       | CHN      | EUR       | HIS       |         |
| n (%)                              | 1634 (26) | 764 (12) | 2491 (39) | 1428 (23) |         |
| Age, years                         | 62 (10)   | 62 (10)  | 63 (10)   | 61 (10)   | 0.0019  |
| Sex, n (%) female                  | 880 (54)  | 387 (51) | 1297 (52) | 736 (52)  | 0.43    |
| Body mass index, kg/m <sup>2</sup> | 30 (5.9)  | 24 (3.3) | 28 (5.1)  | 29 (5.1)  | <0.0001 |
| Systolic blood pressure, mmHg      | 132 (22)  | 125 (22) | 123 (20)  | 127 (22)  | <0.0001 |
| Diastolic blood pressure, mmHg     | 74 (10)   | 72 (10)  | 70 (9.9)  | 72 (10)   | <0.0001 |
| Hypertension, n (%) Yes            | 965 (59)  | 289 (38) | 964 (39)  | 596 (42)  | <0.0001 |
| Diabetes mellitus, n (%) Yes       | 275 (17)  | 101 (13) | 149 (6)   | 252 (18)  | <0.0001 |
| Total cholesterol, mg/dl           | 189 (36)  | 192 (31) | 196 (35)  | 198 (38)  | <0.0001 |
| HDL cholesterol, mg/dl             | 52 (15)   | 49 (12)  | 52 (15)   | 47 (13)   | <0.0001 |
| LDL cholesterol, mg/dl             | 116 (33)  | 115 (29) | 117 (30)  | 120 (33)  | 0.02    |
| Triglycerides, mg/dl               | 105 (70)  | 143 (84) | 133 (90)  | 159 (102) | <0.0001 |
| Antilipidemic therapy, % Yes       | 259 (16)  | 109 (14) | 453 (18)  | 190 (13)  | 0.0004  |
| Current smoker, n (%) Yes          | 300 (18)  | 43 (6)   | 286 (12)  | 193 (14)  | <0.0001 |
| Current use of alcohol, n (%) yes  | 803 (50)  | 234 (31) | 1772 (72) | 667 (47)  | <0.0001 |
| CAC > 0, n (%) yes                 | 719 (44)  | 388 (51) | 1412 (57) | 653 (46)  | <0.0001 |
| CAC Categories, Agatston score     |           |          |           |           | <0.0001 |
| < 50, n (%)                        | 1226 (75) | 538 (70) | 1581 (64) | 1054 (74) |         |
| 50-149, n (%)                      | 160 (10)  | 105 (14) | 275 (11)  | 153 (11)  |         |
| 150-399, n (%)                     | 118 (7)   | 70 (9)   | 308 (12)  | 105 (7)   |         |
| > 400, n (%)                       | 130 (8)   | 51 (7)   | 327 (13)  | 116 (8)   |         |
| CHD events (all), n (%)            | 100 (6)   | 34 (5)   | 188 (8)   | 91 (6)    |         |

AFA, African American; CAC, coronary artery calcium; CHD, coronary heart disease; CHN, Chinese American; EUR, European American; HDL, high-density lipoprotein; HIS, Hispanic American; LDL, low-density lipoprotein

\*Comparison across race/ethnicity using analysis of variance (Krusal-Wallis) for continuous variables and chi-square test (exact) for categorical variables.

Table S2. Marginal associations of Exam 1 Characteristics (Beta per SD of HGF) with circulating serum HGF levels.

| Characteristics   | RACE   |         |         |         |        |         |         |         |
|-------------------|--------|---------|---------|---------|--------|---------|---------|---------|
|                   | AFA    |         | CHN     |         | EUR    |         | HIS     |         |
|                   | BETA   | P-VALUE | BETA    | P-VALUE | BETA   | P-VALUE | BETA    | P-VALUE |
| Age               | 0.024  | <0.0001 | 0.027   | <0.0001 | 0.026  | <0.0001 | 0.025   | <0.0001 |
| Gender (female)   | 0.032  | 0.48    | <0.0001 | 0.72    | 0.163  | <0.0001 | 0.099   | 0.07    |
| BMI               | 0.015  | <0.0001 | 0.045   | <0.0001 | 0.046  | <0.0001 | 0.048   | <0.0001 |
| LDL               | -0.002 | 0.002   | -0.001  | 0.43    | -0.001 | 0.10    | -0.003  | 0.0001  |
| HDL               | -0.006 | <0.0001 | -0.006  | 0.016   | -0.006 | <0.0001 | -0.007  | 0.0006  |
| Triglycerides     | 0.001  | 0.0003  | 0.001   | 0.0003  | 0.001  | <0.0001 | -0.0001 | 0.71    |
| Hypertension (no) | -0.326 | <0.0001 | -0.374  | <0.0001 | -0.391 | <0.0001 | -0.393  | <0.0001 |
| Diabetes (no)     | -0.342 | <0.0001 | -0.524  | <0.0001 | -0.698 | <0.0001 | -0.511  | <0.0001 |
| Smoking           | -      | <0.0001 | -       | 0.010   | -      | <0.0001 | -       | 0.0002  |
| Never             | -0.371 | <0.0001 | -0.336  | 0.0010  | -0.324 | <0.0001 | -0.328  | <0.0001 |
| Former            | -0.242 | 0.0002  | -0.434  | 0.002   | -0.327 | <0.0001 | -0.208  | 0.017   |
| Current (ref)     | -      | -       | -       | -       | -      | -       | -       | -       |
| Alcohol (no)      | 0.082  | 0.07    | 0.076   | 0.23    | 0.220  | <0.0001 | 0.136   | 0.012   |

AFA, African American; BMI, body mass index; BP, blood pressure; CHN, Chinese American; EUR, European American; HDL, high-density lipoprotein; HIS, Hispanic American; LDL, low-density lipoprotein

Table S3. Distribution of SNP and gene counts by race/ethnicity.

| Race | Single SNPs |             |        | Genes      |
|------|-------------|-------------|--------|------------|
|      | MAF >0.5%   | Monomorphic | Total  | # Testable |
| AFA  | 228547      | 102943      | 417752 | 10765      |
| CHN  | 154497      | 230385      | 418460 | 3005       |
| EUR  | 181029      | 123939      | 417771 | 9146       |
| HIS  | 213057      | 111045      | 417770 | 9085       |

AFA, African American; CHN, Chinese American; EUR, European American; HIS, Hispanic American; MAF, minor allele frequency; SNP, single nucleotide polymorphism

Table S4. Significant ( $P < 4E-06$ ) and suggestive ( $P < 1E-04$ ) gene-based associations with HGF.

| Gene              | Gene-based P-value |          |          |          |       |
|-------------------|--------------------|----------|----------|----------|-------|
|                   | META               | AFA      | CHN      | EUR      | HIS   |
| <i>FASN</i>       | 0.153              | 1.000    | 4.34E-07 | 0.645    | 0.868 |
| <i>HGFAC</i>      | 5.09E-07           | 0.706    | 0.770    | 1.12E-05 | 0.013 |
| <i>AIBG</i>       | 0.003              | 6.93E-07 | -        | 0.151    | 0.183 |
| <i>NHLRC1</i> *   | 1.06E-05           | 1.06E-05 | -        | -        | -     |
| <i>OR10A7</i> *   | 0.199              | 0.676    | 0.126    | 1.25E-05 | 1.000 |
| <i>ACSM5</i> *    | 0.019              | 4.65E-05 | -        | 0.561    | 0.894 |
| <i>C11orf30</i> * | 0.006              | 5.19E-05 | -        | -        | 0.364 |
| <i>LRRC27</i> *   | 0.019              | 5.30E-05 | 0.879    | 0.188    | 1.000 |
| <i>YTHDF2</i> *   | 8.68E-05           | 0.059    | -        | 4.58E-04 | 0.003 |
| <i>HGF</i> *      | 9.84E-05           | 0.014    | -        | -        | 0.001 |

\*Not statistically significant at  $\alpha = 4E-06$

AFA, African American; CHN, Chinese American; EUR, European American; HIS, Hispanic American



Table S5. Characteristics of AIBG variants from gene-level significant test result in African Americans.

| rsID        | Chr | Position | Ref/Alt | MAC | Impact  | SIFT Prediction | PolyPhen Prediction |
|-------------|-----|----------|---------|-----|---------|-----------------|---------------------|
| rs145144275 | 19  | 58861808 | G/A     | 8   | p.C252R | Deleterious     | Possibly Damaging   |
| rs140084941 | 19  | 58861838 | G/A     | 8   | p.I242V | Tolerated       | Benign              |
| rs145532647 | 19  | 58862937 | A/G     | 2   | p.R122W | Tolerated       | Benign              |
| rs115704323 | 19  | 58863753 | A/G     | 40  | p.A170V | Tolerated       | Possibly Damaging   |
| rs144305381 | 19  | 58864359 | A/G     | 2   | p.R92H  | Deleterious     | Possibly Damaging   |
| rs151098196 | 19  | 58864366 | A/G     | 1   | p.R90C  | Deleterious     | Benign              |
| rs145851378 | 19  | 58864476 | G/A     | 1   | p.L53P  | Deleterious     | Probably Damaging   |
| rs7256067   | 19  | 58864491 | A/G     | 5   | p.T48M  | Deleterious     | Probably Damaging   |

MAC, Minor allele count

Table S6. Characteristics of FASN variants from gene-level significant test result in Chinese Americans

| rsID        | Chr | Position | Ref/Alt | MAC | Impact    | SIFT Prediction | PolyPhen Prediction |
|-------------|-----|----------|---------|-----|-----------|-----------------|---------------------|
| rs2228306   | 17  | 80040034 | A/G     | 15  | p. V2005A | tolerated       | benign              |
| rs17848945  | 17  | 80040513 | G/A     | 16  | p. V1937I | tolerated       | benign              |
| rs148840593 | 17  | 80040530 | G/A     | 3   | p. R1931Q | tolerated       | benign              |
| rs2228305   | 17  | 80042792 | G/A     | 7   | p. V1483I | tolerated       | benign              |
| rs200840955 | 17  | 80043274 | G/A     | 2   | p. A1376V | tolerated       | benign              |
| rs150915750 | 17  | 80043506 | G/A     | 1   | p. P1325L | tolerated       | possibly_damaging   |

MAC, Minor allele count

Table S7. Characteristics of variants included in the gene-level meta-analysis significant test result HGFAC.

| SNP         | Chr | Position | MAC |     |     |     | Ref/Alt | Impact      | Sift Prediction | PolyPhen Prediction |
|-------------|-----|----------|-----|-----|-----|-----|---------|-------------|-----------------|---------------------|
|             |     |          | AFA | CHN | EUR | HIS |         |             |                 |                     |
| rs143571255 | 4   | 3444460  | 0   | 12  | 0   | 0   | T/A     | p.N40I      | deleterious     | possibly_damaging   |
| rs148006288 | 4   | 3444477  | 5   | 0   | 1   | 5   | G/C     | p.E46Q      | tolerated       | benign              |
| rs144680516 | 4   | 3444510  | 5   | 0   | 0   | 2   | G/A     | p.T57A      | tolerated       | benign              |
| rs140416920 | 4   | 3445858  | 4   | 0   | 9   | 16  | A/G     | p.R190W     | deleterious     | possibly_damaging   |
| rs151270002 | 4   | 3446117  | 38  | 0   | 0   | 3   | T/A     | p.E226D     | tolerated       | probably_damaging   |
| rs199942662 | 4   | 3446140  | 0   | 1   | 0   | 2   | A/G     | p.R234Q     | tolerated       | benign              |
| rs201082880 | 4   | 3446150  | 0   | 0   | 2   | 0   | C/G     | p.C237W     | deleterious     | probably_damaging   |
| rs140008278 | 4   | 3446161  | 0   | 0   | 3   | 1   | A/G     | p.R241Q     | tolerated       | benign              |
| rs142652510 | 4   | 3447042  | 0   | 0   | 1   | 1   | A/G     | p.A356V     | tolerated       | benign              |
| rs140988254 | 4   | 3447063  | 0   | 0   | 3   | 1   | A/G     | p.R363H     | tolerated       | benign              |
| rs201249501 | 4   | 3447821  | 0   | 1   | 2   | 0   | A/G     | p.E385D     | tolerated       | benign              |
| rs143981206 | 4   | 3449284  | 0   | 0   | 4   | 0   | A/C     | p.T474M     | deleterious     | probably_damaging   |
| rs139240360 | 4   | 3449360  | 0   | 0   | 0   | 1   | G/A     | Splice Site | -               | -                   |
| rs146026447 | 4   | 3449667  | 4   | 0   | 4   | 0   | A/G     | p.S514L     | deleterious     | probably_damaging   |
| rs139967384 | 4   | 3449863  | 21  | 0   | 1   | 0   | A/G     | p.G549S     | tolerated       | benign              |
| rs114303452 | 4   | 3449915  | 8   | 0   | 83  | 15  | G/A     | p.K566R     | tolerated       | benign              |
| rs186999542 | 4   | 3449941  | 0   | 6   | 0   | 0   | A/G     | p.A575T     | tolerated       | benign              |
| rs148123448 | 4   | 3451120  | 9   | 0   | 0   | 0   | A/G     | p.P648S     | tolerated       | benign              |
| rs16844370  | 4   | 3446112  | 128 | 0   | 0   | 22  | A/G     | p.V225M     | deleterious     | probably_damaging   |
| rs16844401  | 4   | 3449652  | 106 | 124 | 357 | 204 | A/G     | p.R509H     | tolerated       | benign              |
| rs2498323   | 4   | 3451109  | 319 | 70  | 478 | 230 | A/G     | p.R644Q     | tolerated       | benign              |
| rs41264743  | 4   | 3446079  | 11  | 1   | 54  | 25  | A/C     | p.G214C     | deleterious     | probably_damaging   |

AFA, African American; CHN, Chinese American; EUR, European American; HIS, Hispanic American; MAC, Minor allele count

*Table S8: Association p-values of serum HGF levels with subclinical and clinical disease.*

| <b>Outcome</b>     | <b>AFA</b> | <b>CHN</b> | <b>EUR</b> | <b>HIS</b> |
|--------------------|------------|------------|------------|------------|
| <b>CAC</b>         | <b>P</b>   | <b>P</b>   | <b>P</b>   | <b>P</b>   |
| Model 1            | <0.0001    | 0.07       | <0.0001    | 0.09       |
| Model 2            | 0.002      | 0.96       | <0.0001    | 0.92       |
| <b>Time to CHD</b> | <b>P</b>   | <b>P</b>   | <b>P</b>   | <b>P</b>   |
| Model 1            | 0.003      | 0.20       | <0.0001    | 0.27       |
| Model 2            | 0.38       | 0.44       | <0.0001    | 0.67       |

AFA, African American; CAC, coronary artery calcium; CHD, coronary heart disease; CHN, Chinese American; EUR, European American; HIS, Hispanic American

Model 1 = age and sex

Model 2 = age, sex, BMI, smoking status, LDL, HDL, triglycerides, hypertension, diabetes

Table S9. Associations of serum HGF-associated variants with subclinical and clinical cardiovascular disease in MESA.

|                    | African American   |                | Chinese Americans  |                | European American  |                | Hispanic American  |                |
|--------------------|--------------------|----------------|--------------------|----------------|--------------------|----------------|--------------------|----------------|
| <b>rs5745687</b>   |                    |                |                    |                |                    |                |                    |                |
| <i>CAC</i>         | <i>Beta (S.E.)</i> | <i>p value</i> |
| Model 1            | -191.6 (120.9)     | 0.113          | -                  | -              | 25.2 (36.3)        | 0.488          | 132.4 (66.5)       | 0.046          |
| Model 2            | -182.5 (10.1)      | 0.129          | -                  | -              | 15.9 (36.2)        | 0.661          | 140.4 (65.6)       | 0.032          |
| <i>CHD</i>         | <i>HR (95% CI)</i> | <i>p value</i> |
| Model 1            | 1.35 (0.53,3.49)   | 0.531          | -                  | -              | 0.95 (0.65,1.39)   | 0.796          | 1.62 (0.93,2.83)   | 0.090          |
| Model 2            | 1.33 (0.50,3.49)   | 0.568          | -                  | -              | 0.93 (0.64,1.37)   | 0.726          | 1.59 (0.89,2.79)   | 0.111          |
| <b>rs16844364</b>  |                    |                |                    |                |                    |                |                    |                |
| <i>CAC</i>         | <i>Beta (S.E.)</i> | <i>p value</i> |
| Model 1            | 36.6 (40.6)        | 0.368          | -7.1 (24.1)        | 0.768          | -32.7 (23.2)       | 0.158          | -78.4 (31.4)       | 0.013          |
| Model 2            | 24.7 (40.7)        | 0.544          | -22.0 (23.6)       | 0.352          | -35.2 (23.2)       | 0.129          | -72.8 (31.0)       | 0.019          |
| <i>CHD</i>         | <i>HR (95% CI)</i> | <i>p value</i> |
| Model 1            | 1.34 (0.93,1.94)   | 0.121          | 1.19 (0.74,1.18)   | 0.464          | 0.93 (0.74,1.18)   | 0.563          | 0.99 (0.73,1.35)   | 0.968          |
| Model 2            | 1.29 (0.89,1.87)   | 0.178          | 1.15 (0.72,1.84)   | 0.549          | 0.93 (0.74,1.18)   | 0.566          | 1.01 (0.74,1.37)   | 0.948          |
| <b>rs4690098</b>   |                    |                |                    |                |                    |                |                    |                |
| <i>CAC</i>         | <i>Beta (S.E.)</i> | <i>p value</i> |
| Model 1            | 130.2 (55.6)       | 0.019          | 9.3 (24.1)         | 0.700          | 31.2 (22.6)        | 0.167          | 26.3 (33.0)        | 0.425          |
| Model 2            | 143.3 (55.5)       | 0.010          | 20.9 (23.5)        | 0.373          | 34.3 (22.5)        | 0.128          | 31.3 (32.5)        | 0.335          |
| <i>CHD</i>         | <i>HR (95% CI)</i> | <i>p value</i> |
| Model 1            | 1.26 (0.75,2.11)   | 0.380          | 0.88 (0.57,1.37)   | 0.575          | 1.08 (0.86,1.34)   | 0.524          | 0.85 (0.61,1.18)   | 0.331          |
| Model 2            | 1.27 (0.75,2.13)   | 0.374          | 0.89 (0.56,1.41)   | 0.610          | 1.12 (0.90,1.40)   | 0.313          | 0.81 (0.58,1.14)   | 0.227          |
| <b>rs114303452</b> |                    |                |                    |                |                    |                |                    |                |
| <i>CAC</i>         | <i>Beta (S.E.)</i> | <i>p value</i> |
| Model 1            | -                  | -              | -                  | -              | 12.5 (72.6)        | 0.863          | -0.24 (176.6)      | 0.999          |
| Model 2            | -                  | -              | -                  | -              | 11.4 (72.4)        | 0.875          | 52.4 (171.7)       | 0.716          |
| <i>CHD</i>         | <i>HR (95% CI)</i> | <i>p value</i> |
| Model 1            | -                  | -              | -                  | -              | 1.18 (0.60,2.29)   | 0.635          | -                  | -              |
| Model 2            | -                  | -              | -                  | -              | 1.12 (0.59,2.15)   | 0.729          | -                  | -              |
| <b>rs3748034</b>   |                    |                |                    |                |                    |                |                    |                |
| <i>CAC</i>         | <i>Beta (S.E.)</i> | <i>p value</i> |
| Model 1            | 82.1 (63.6)        | 0.197          | -21.1 (25.9)       | 0.414          | 13.8 (27.2)        | 0.612          | -62.2 (41.9)       | 0.138          |
| Model 2            | 71.1 (63.6)        | 0.264          | -24.5 (25.4)       | 0.334          | 14.3 (27.2)        | 0.598          | -56.7 (41.2)       | 0.169          |
| <i>CHD</i>         | <i>HR (95% CI)</i> | <i>p value</i> |
| Model 1            | 1.23 (0.68,2.23)   | 0.494          | 1.08 (0.68,1.74)   | 0.740          | 1.16 (0.90,1.51)   | 0.253          | 0.77 (0.49,1.21)   | 0.252          |
| Model 2            | 1.22 (0.68,2.19)   | 0.515          | 1.08 (0.67,1.75)   | 0.742          | 1.16 (0.90,1.50)   | 0.259          | 0.79 (0.51,1.23)   | 0.294          |

CI, confidence interval; CAC, coronary artery calcium; CHD, coronary heart disease; HR, hazard ratio; SE, standard error.

Model 1 = age and sex

Model 2 = age, sex, BMI, smoking status, LDL, HDL, triglycerides, hypertension, diabetes

An additive model was fit modeling 0, 1, or 2 copies of the minor allele; associations with nominal  $P < 0.05$  are highlighted in gray.
